# Supplementary material for: Novel Driver Strength Index highlights important cancer genes in TCGA PanCanAtlas patients
Source: bioRxiv or medRxiv preprint supplement (doi:10.1101/2021.08.01.21261447), 2021-08-31

SNA-based oncogenic events

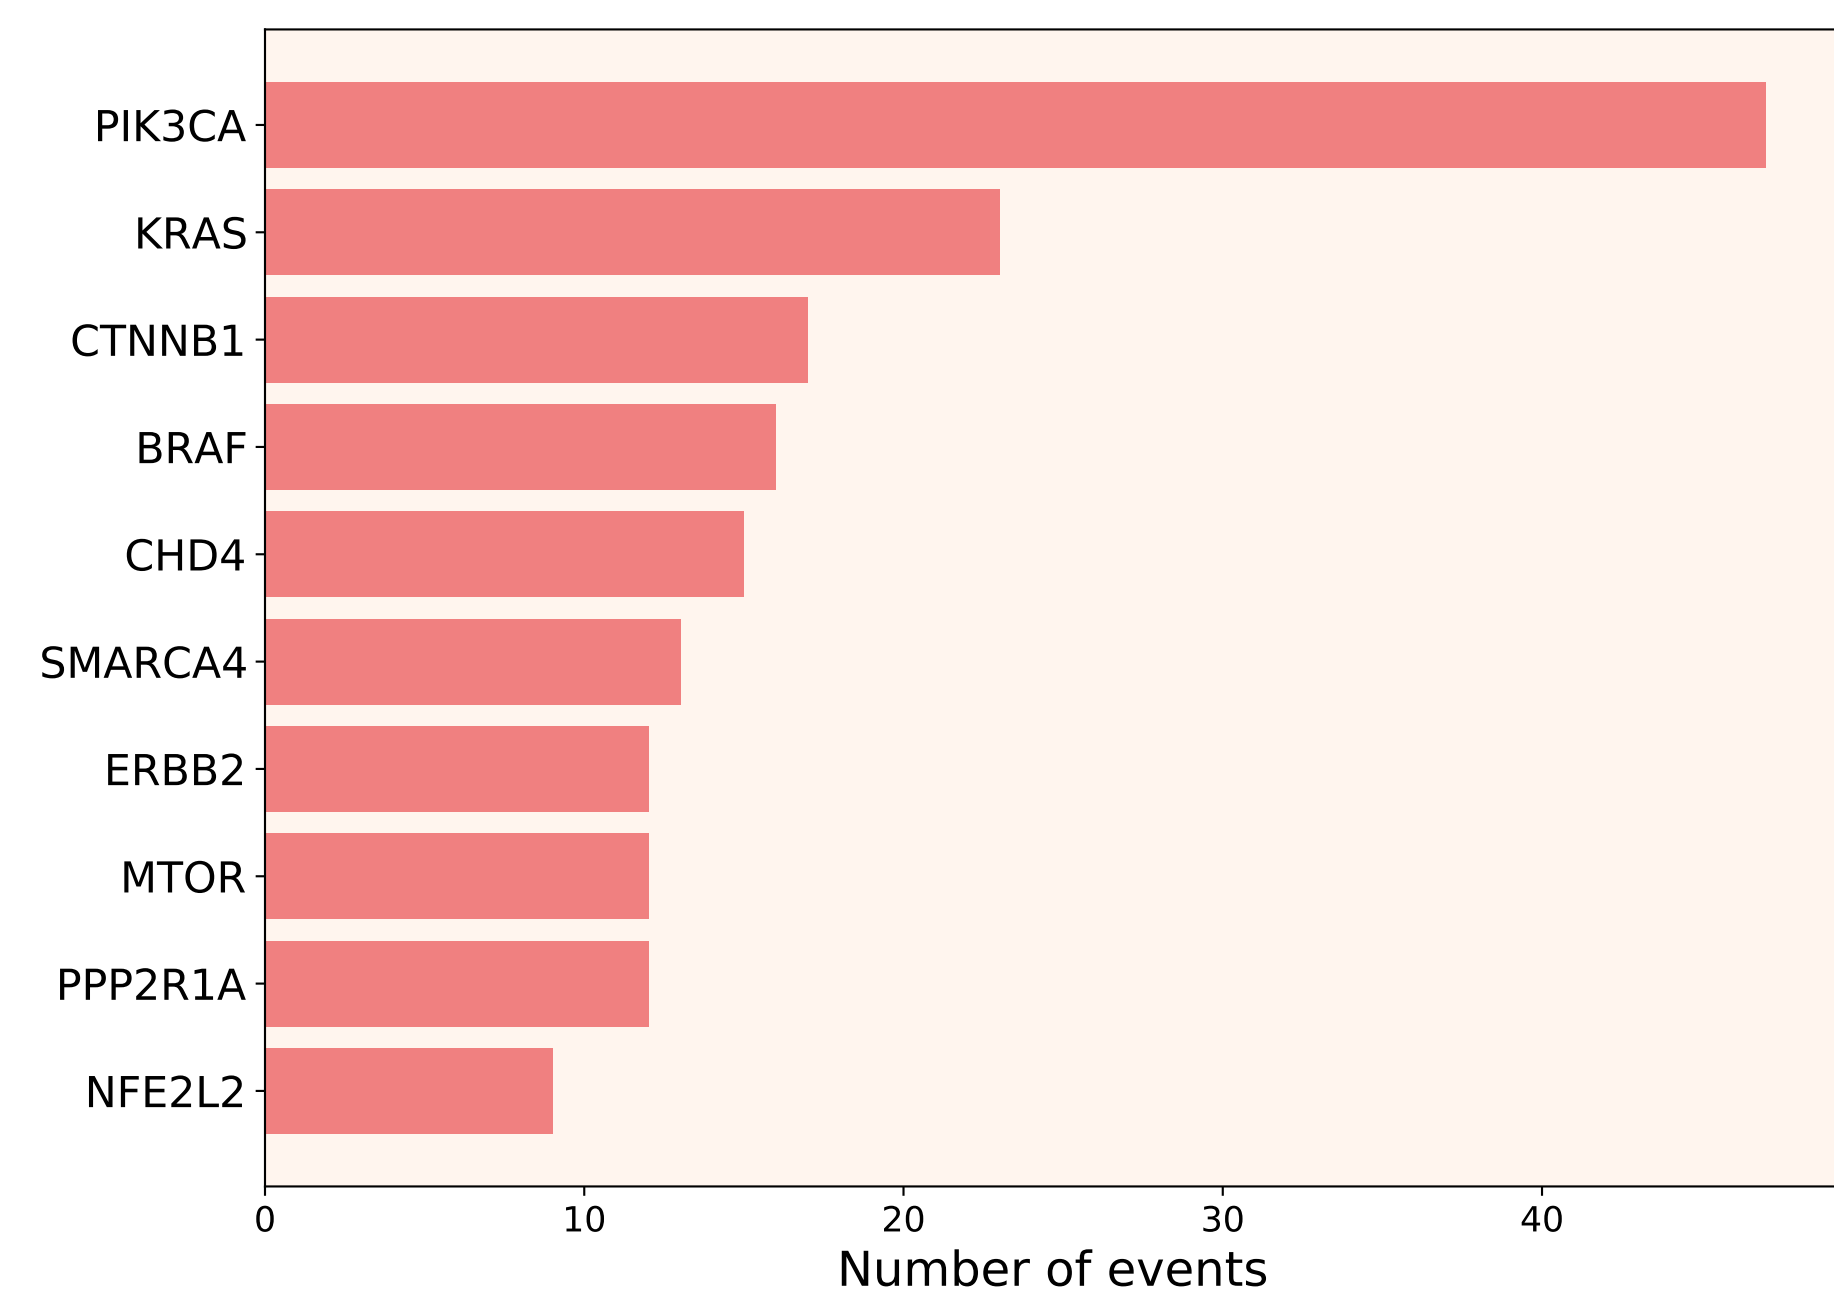

CNA-based oncogenic events

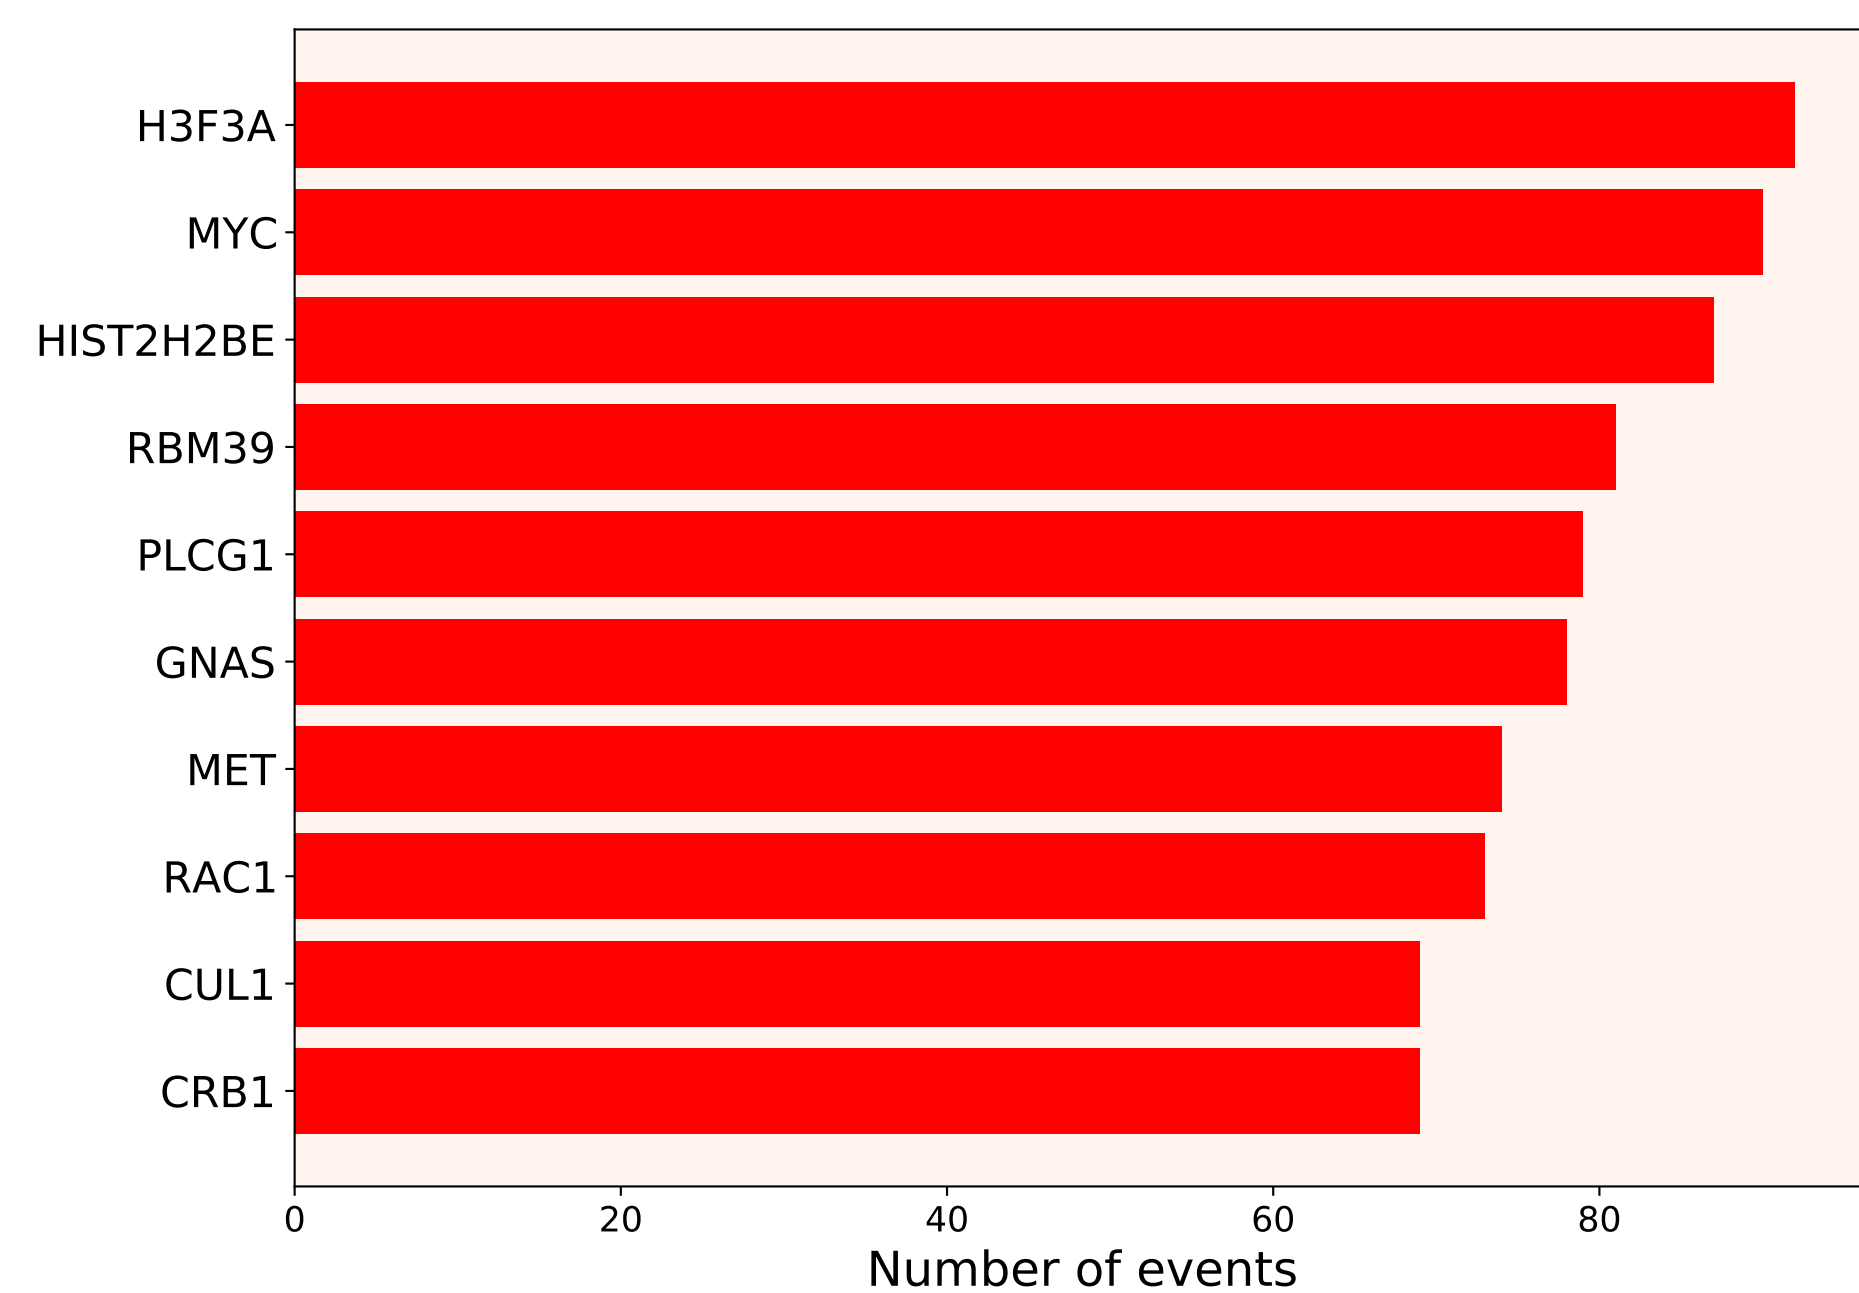

Mixed oncogenic events

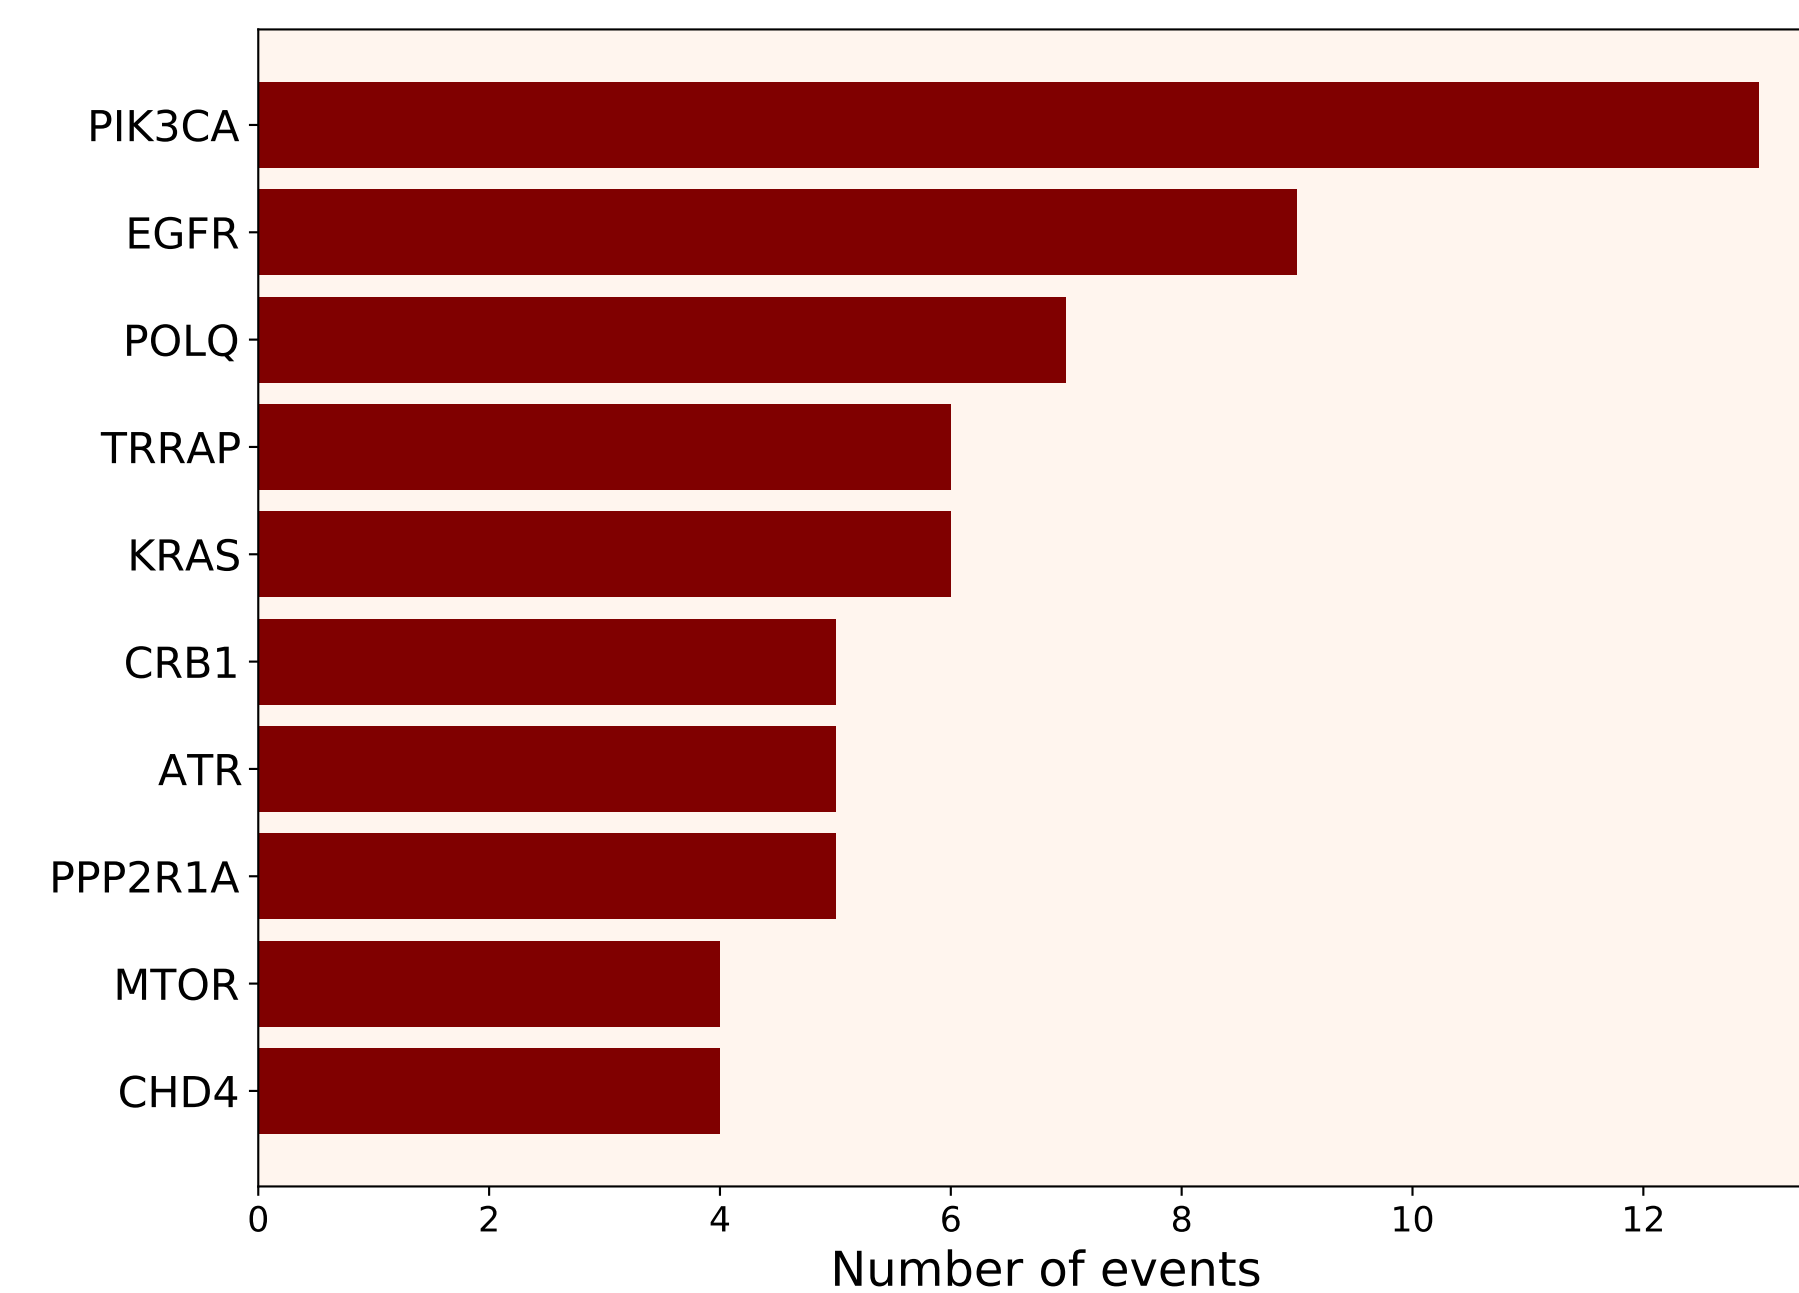

SNA-based tumor suppressor events

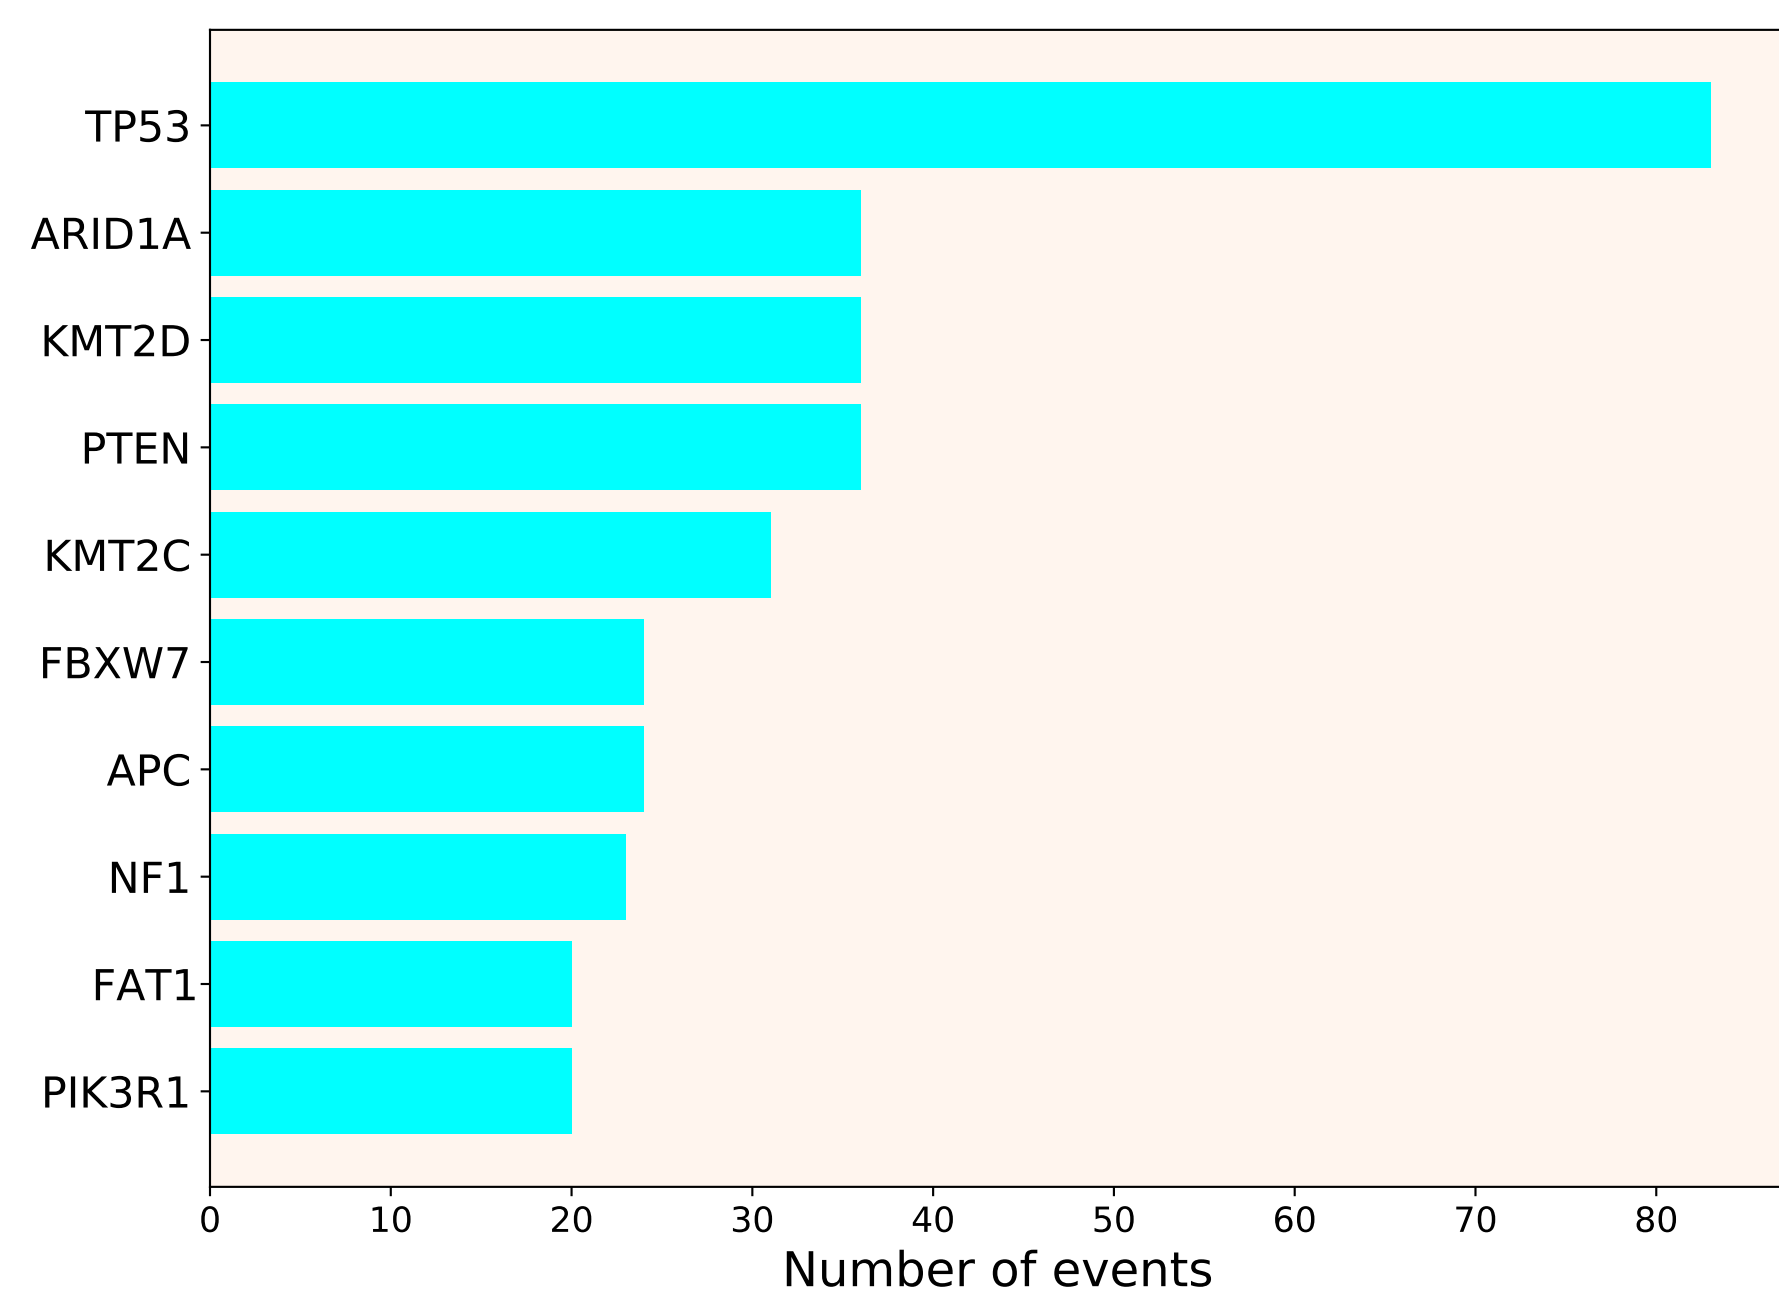

CNA-based tumor suppressor events

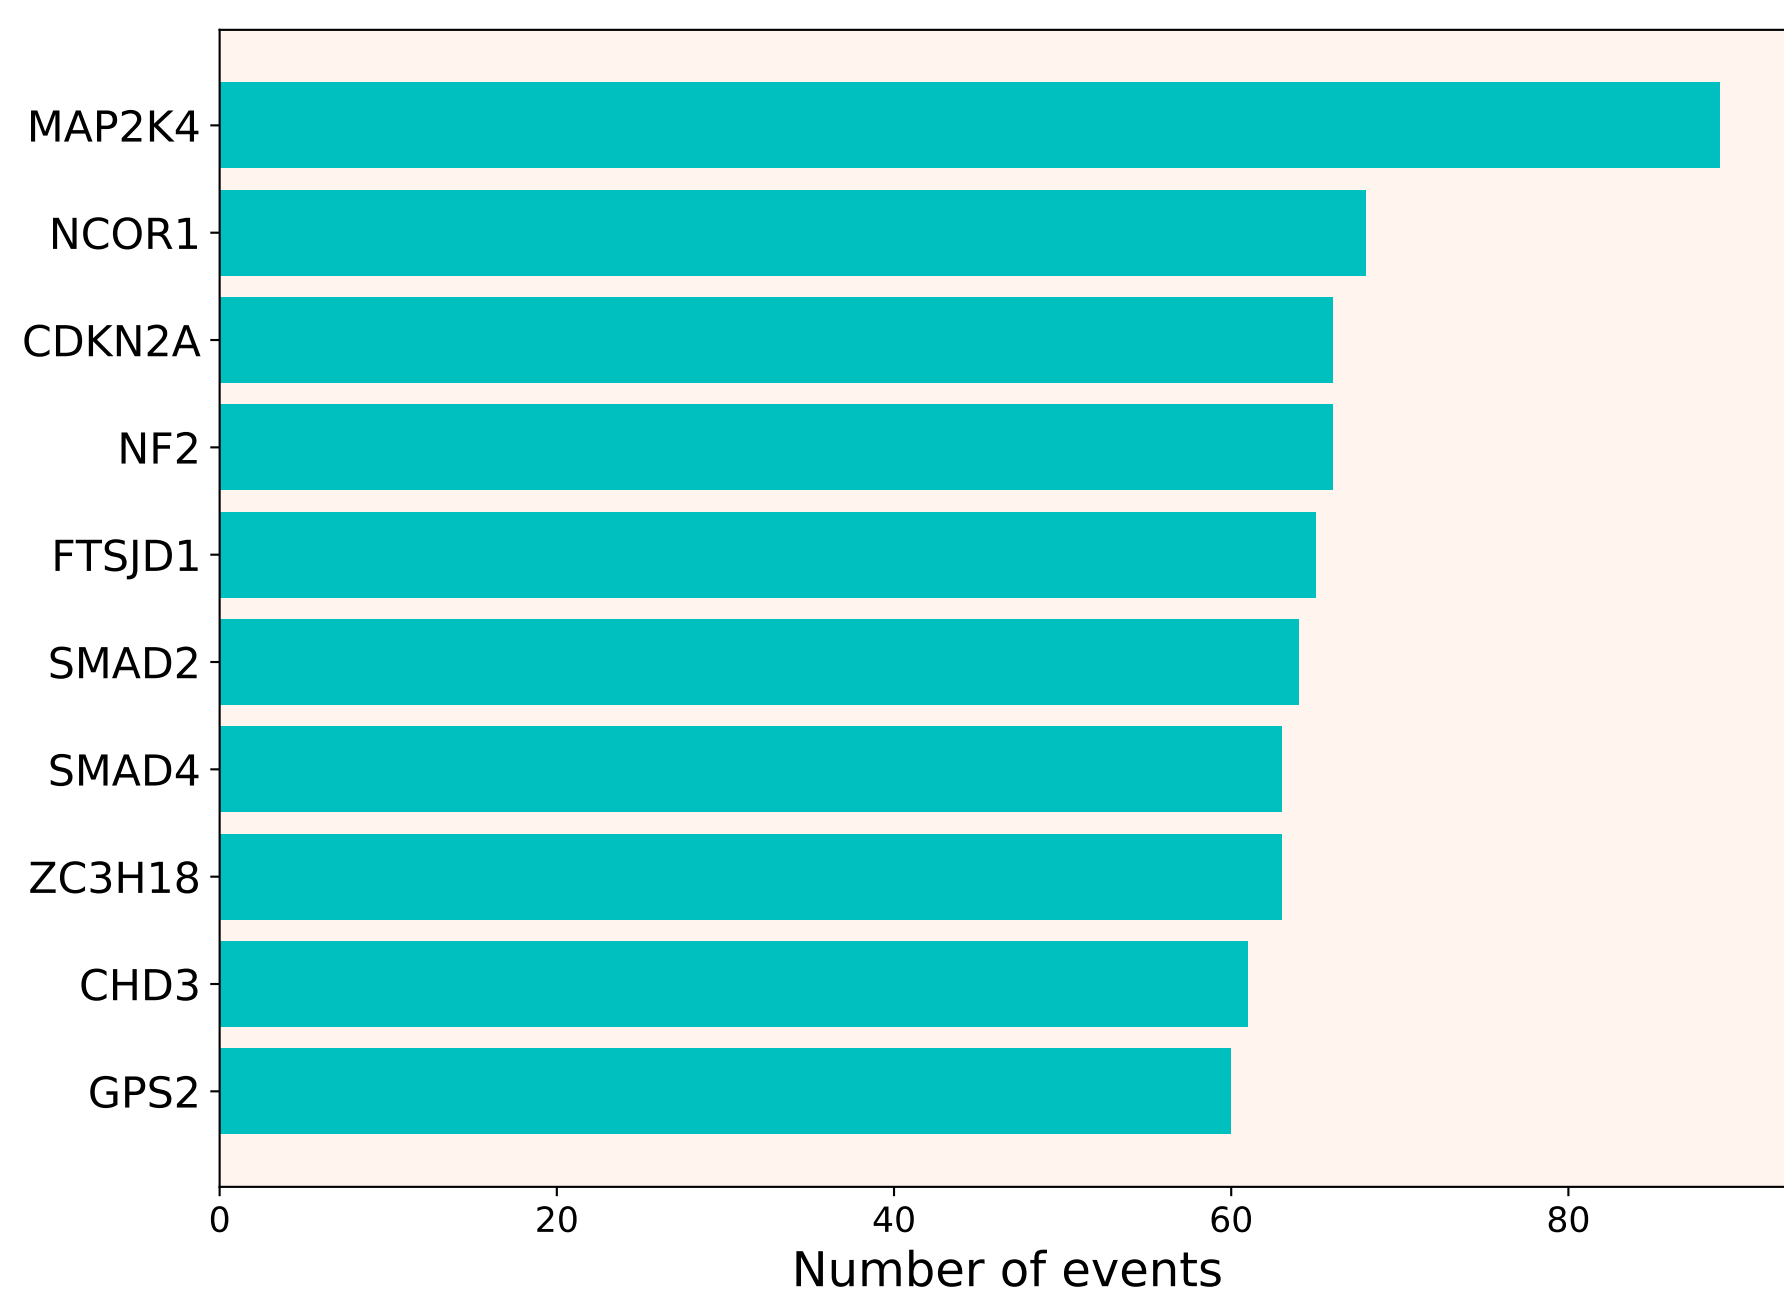

Mixed tumor suppressor events

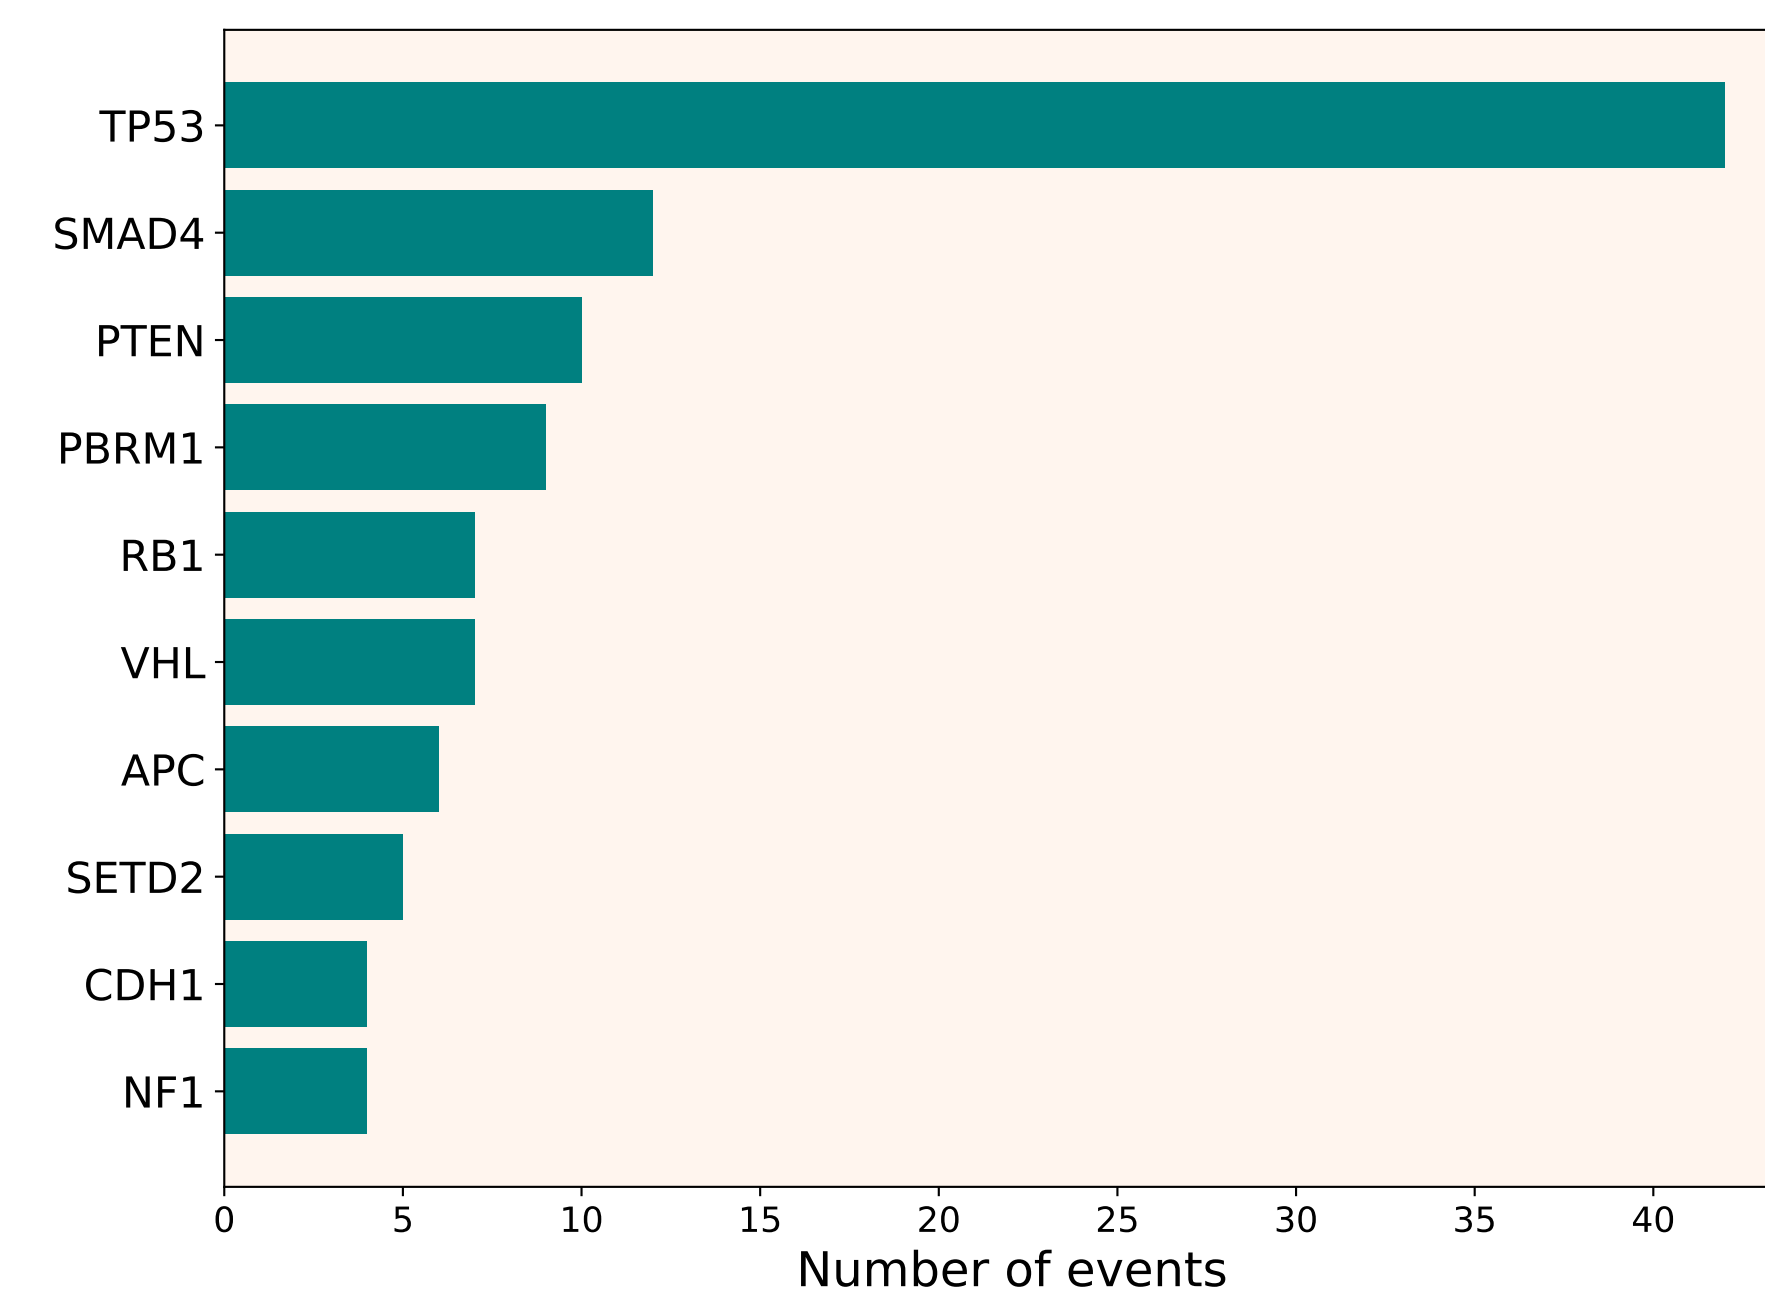

Driver chromosome losses

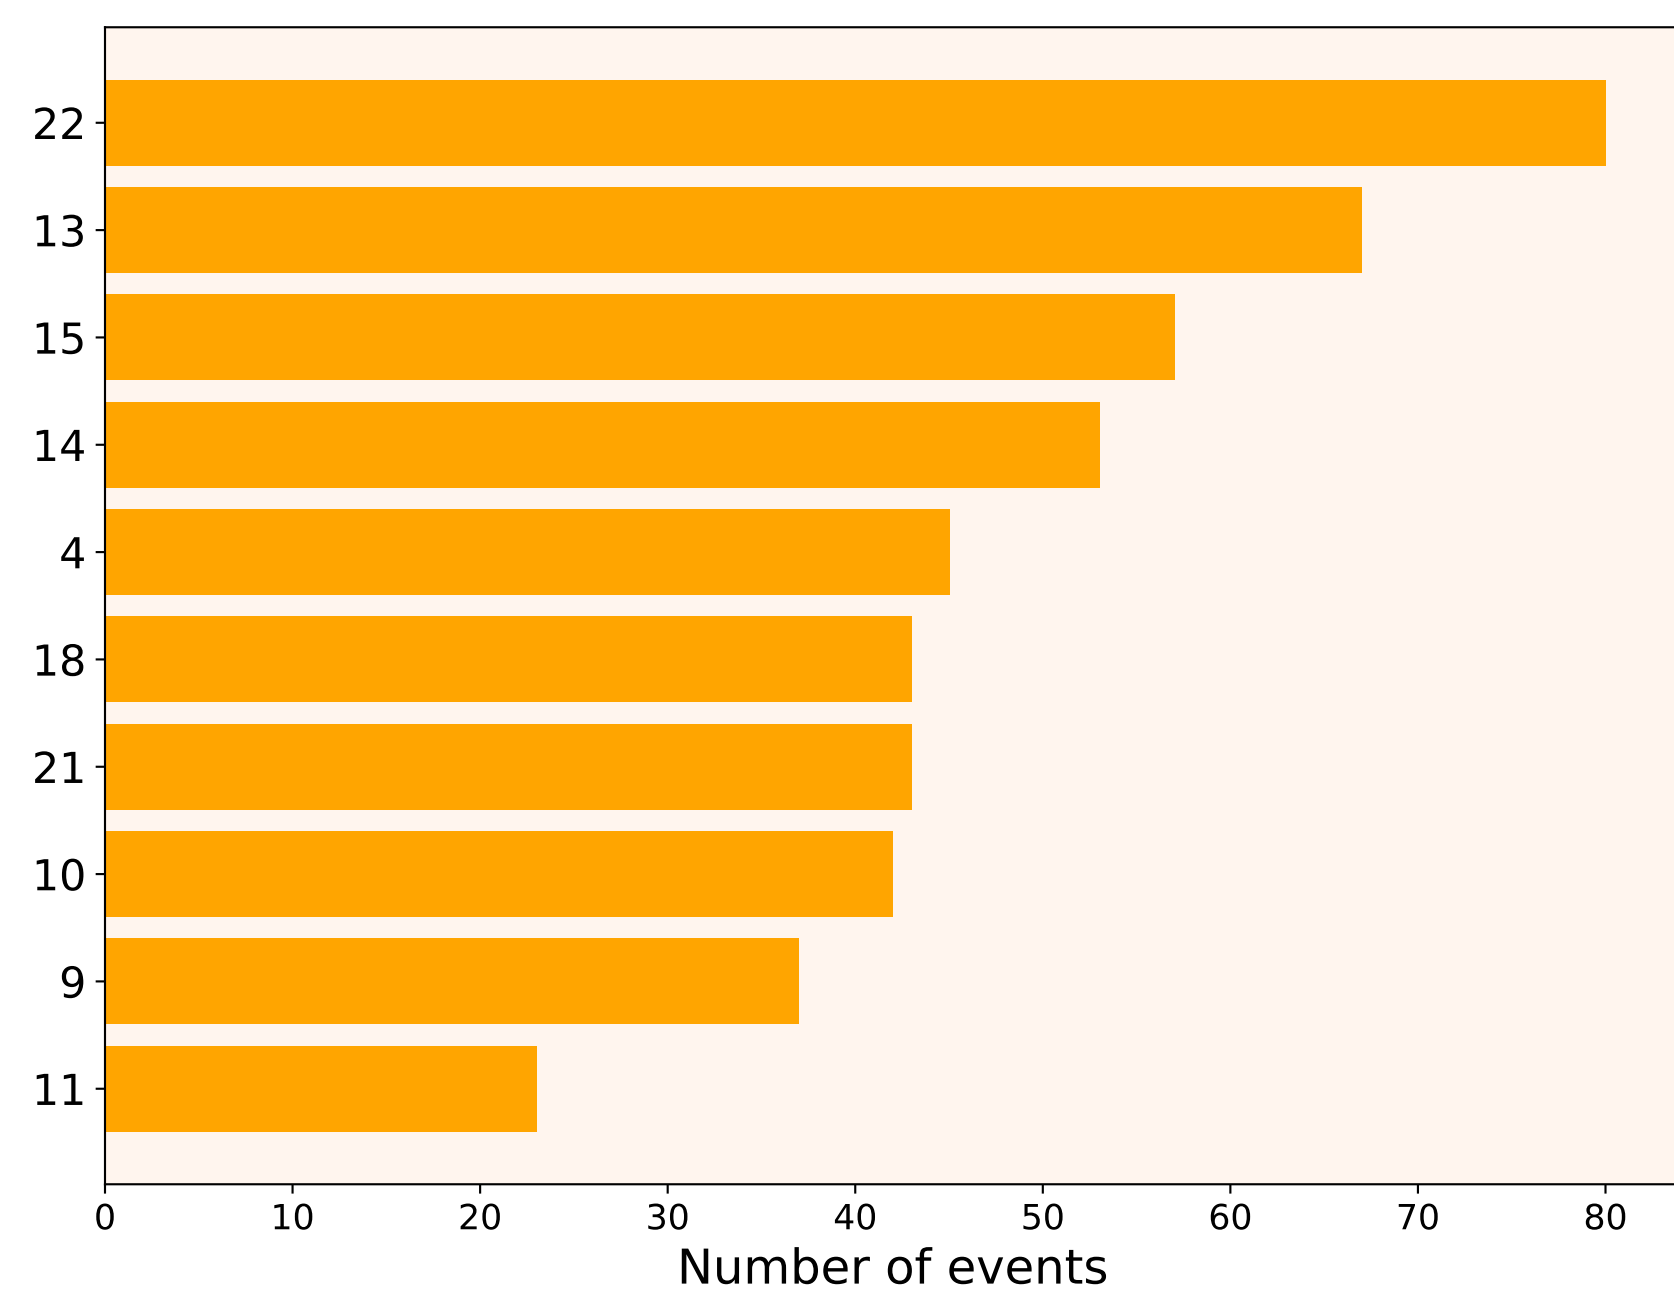

Driver chromosome gains

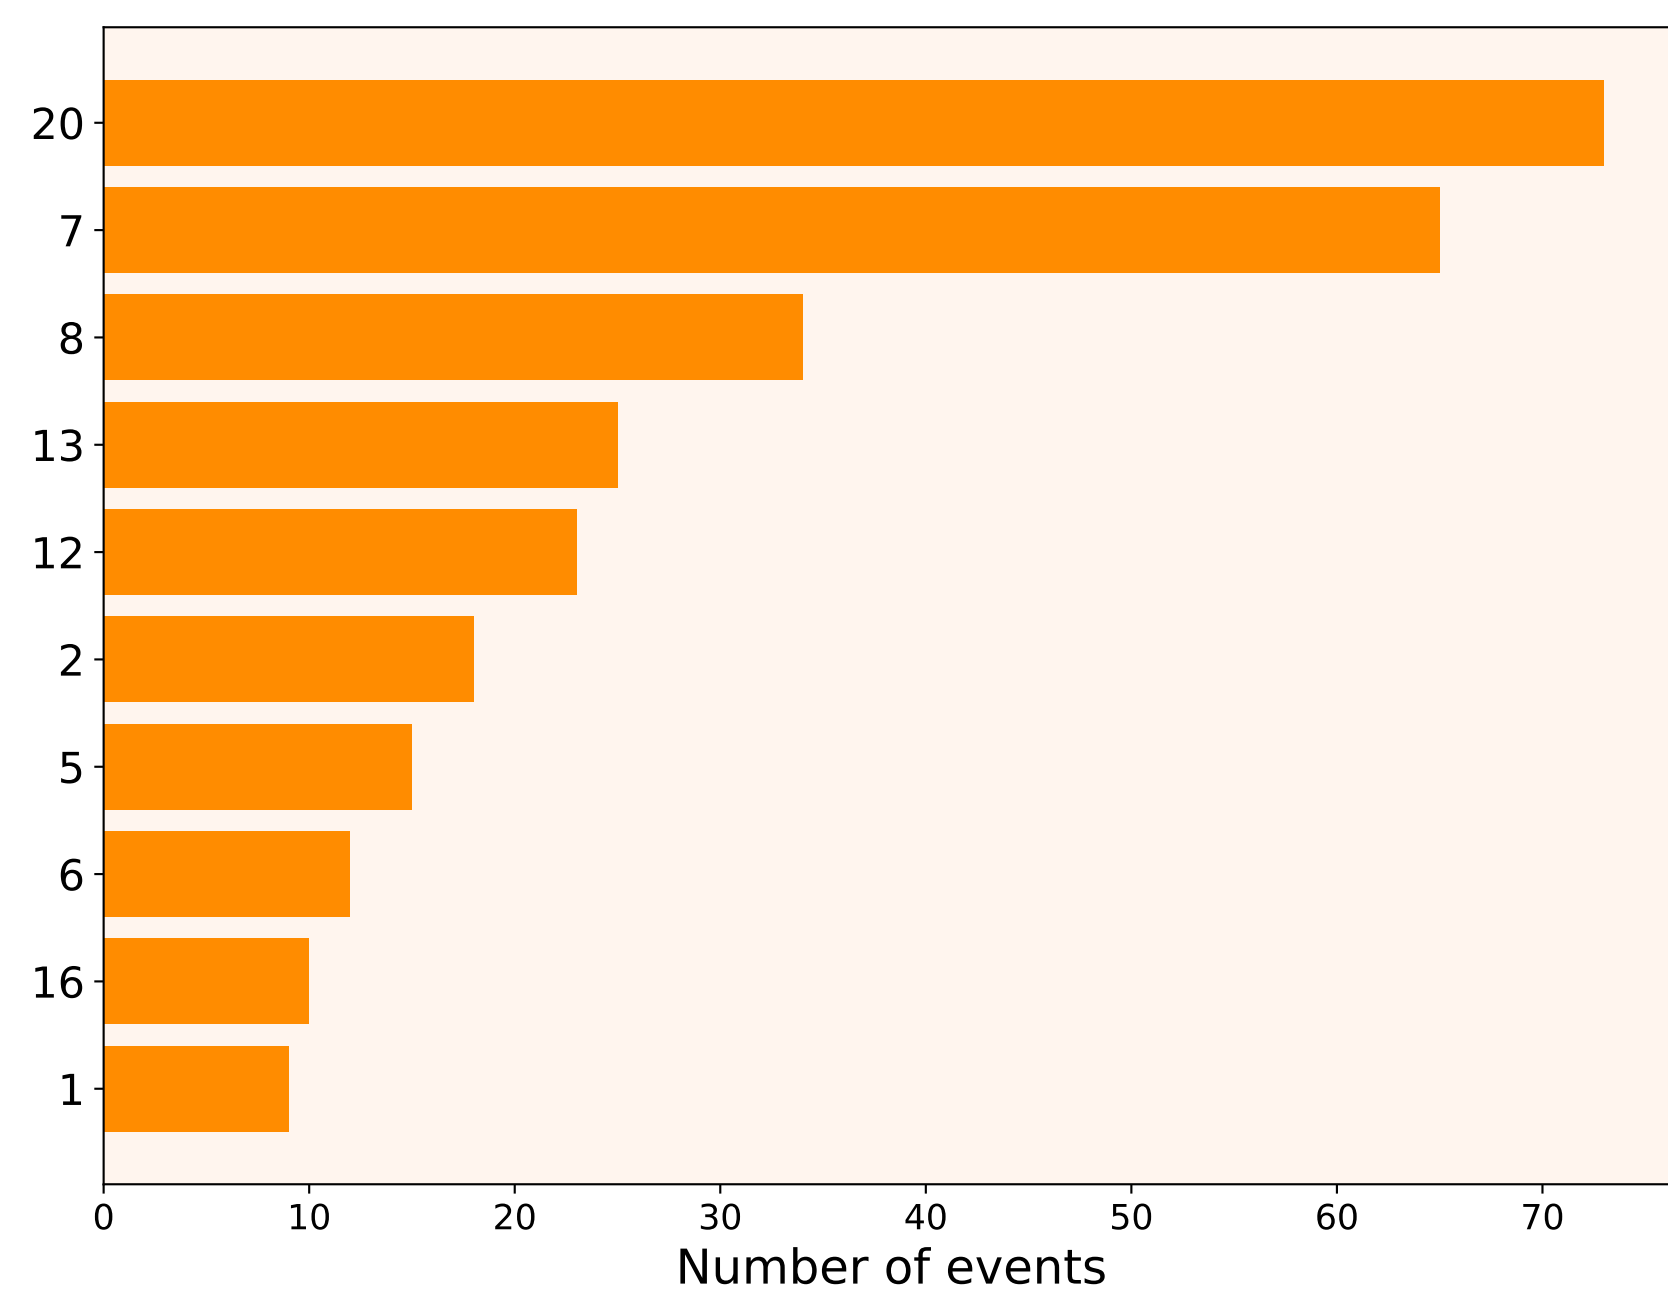

Driver arm losses

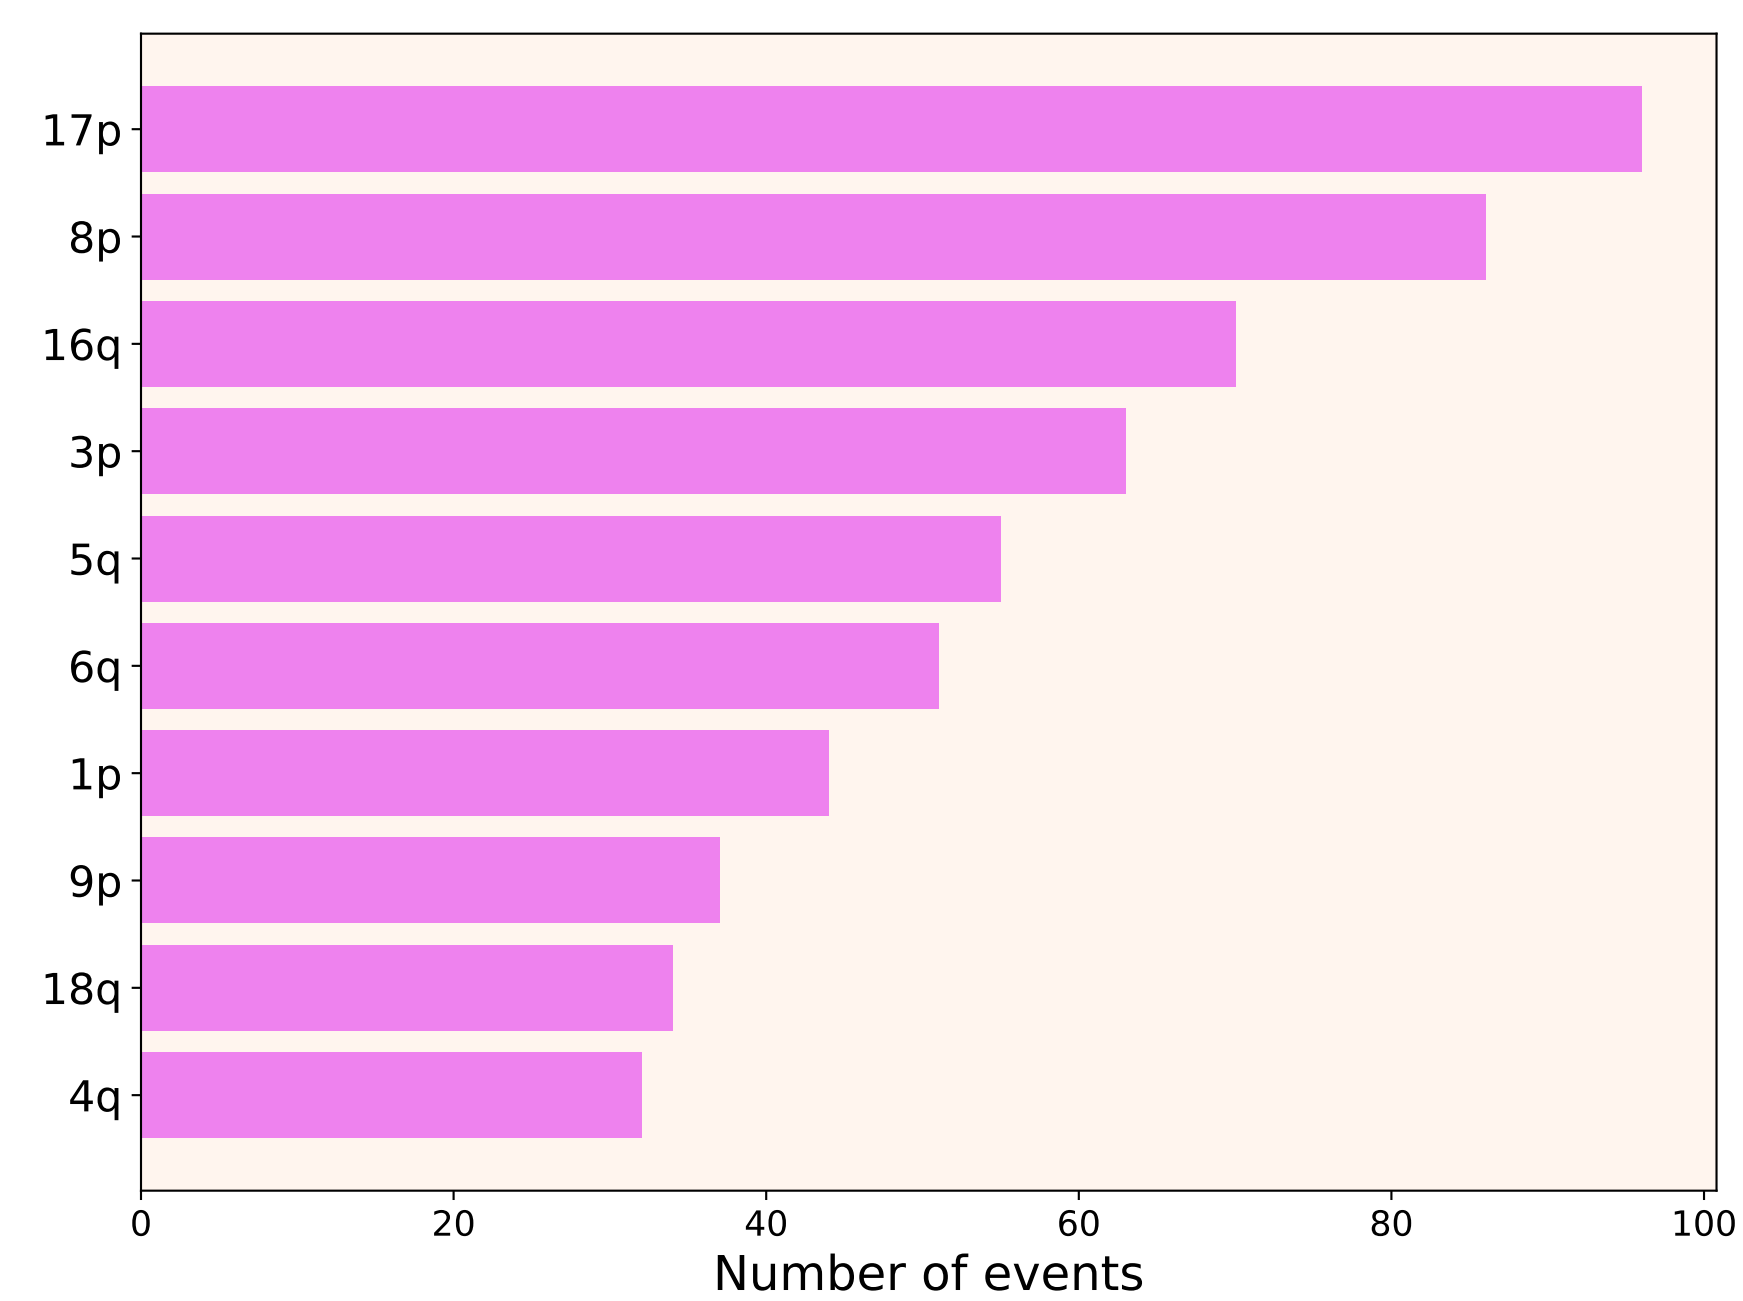

Driver arm gains

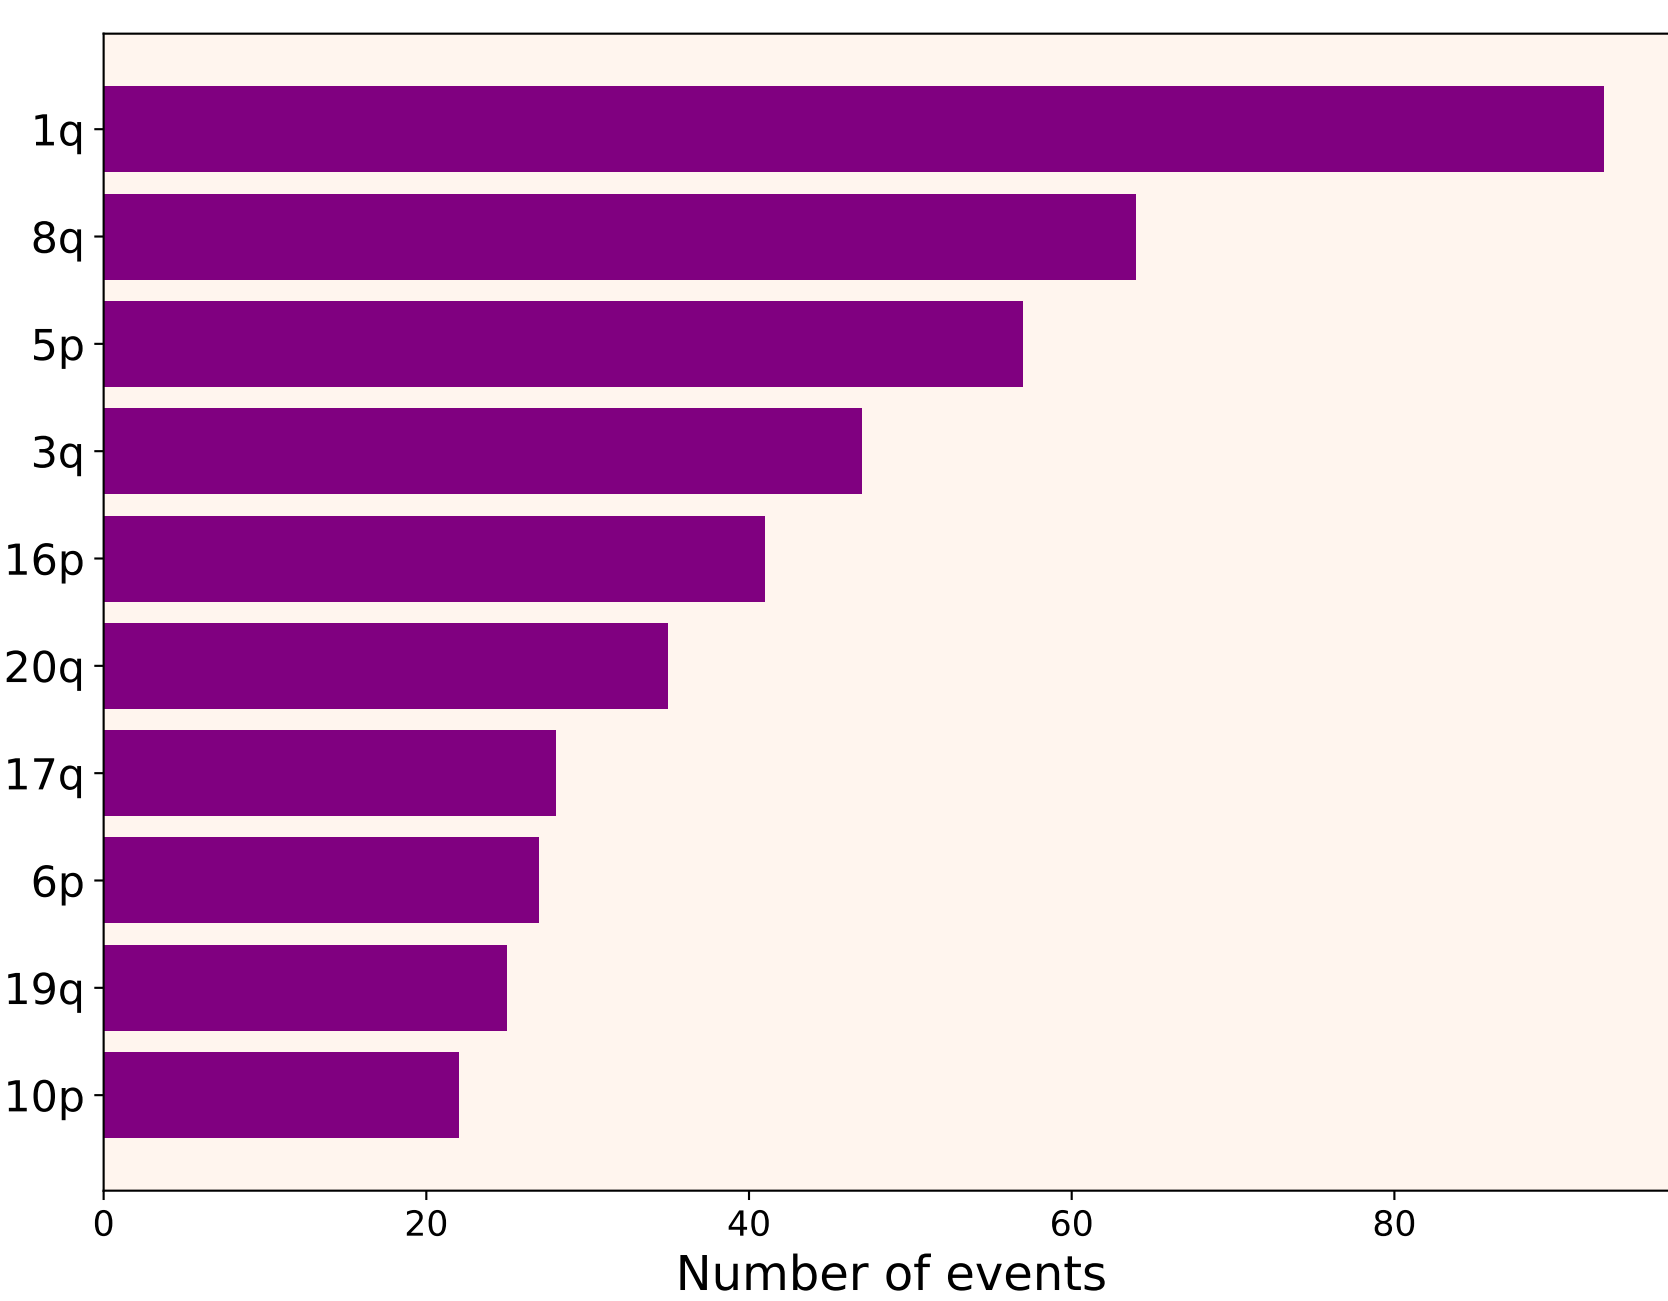

Driver events of all classes

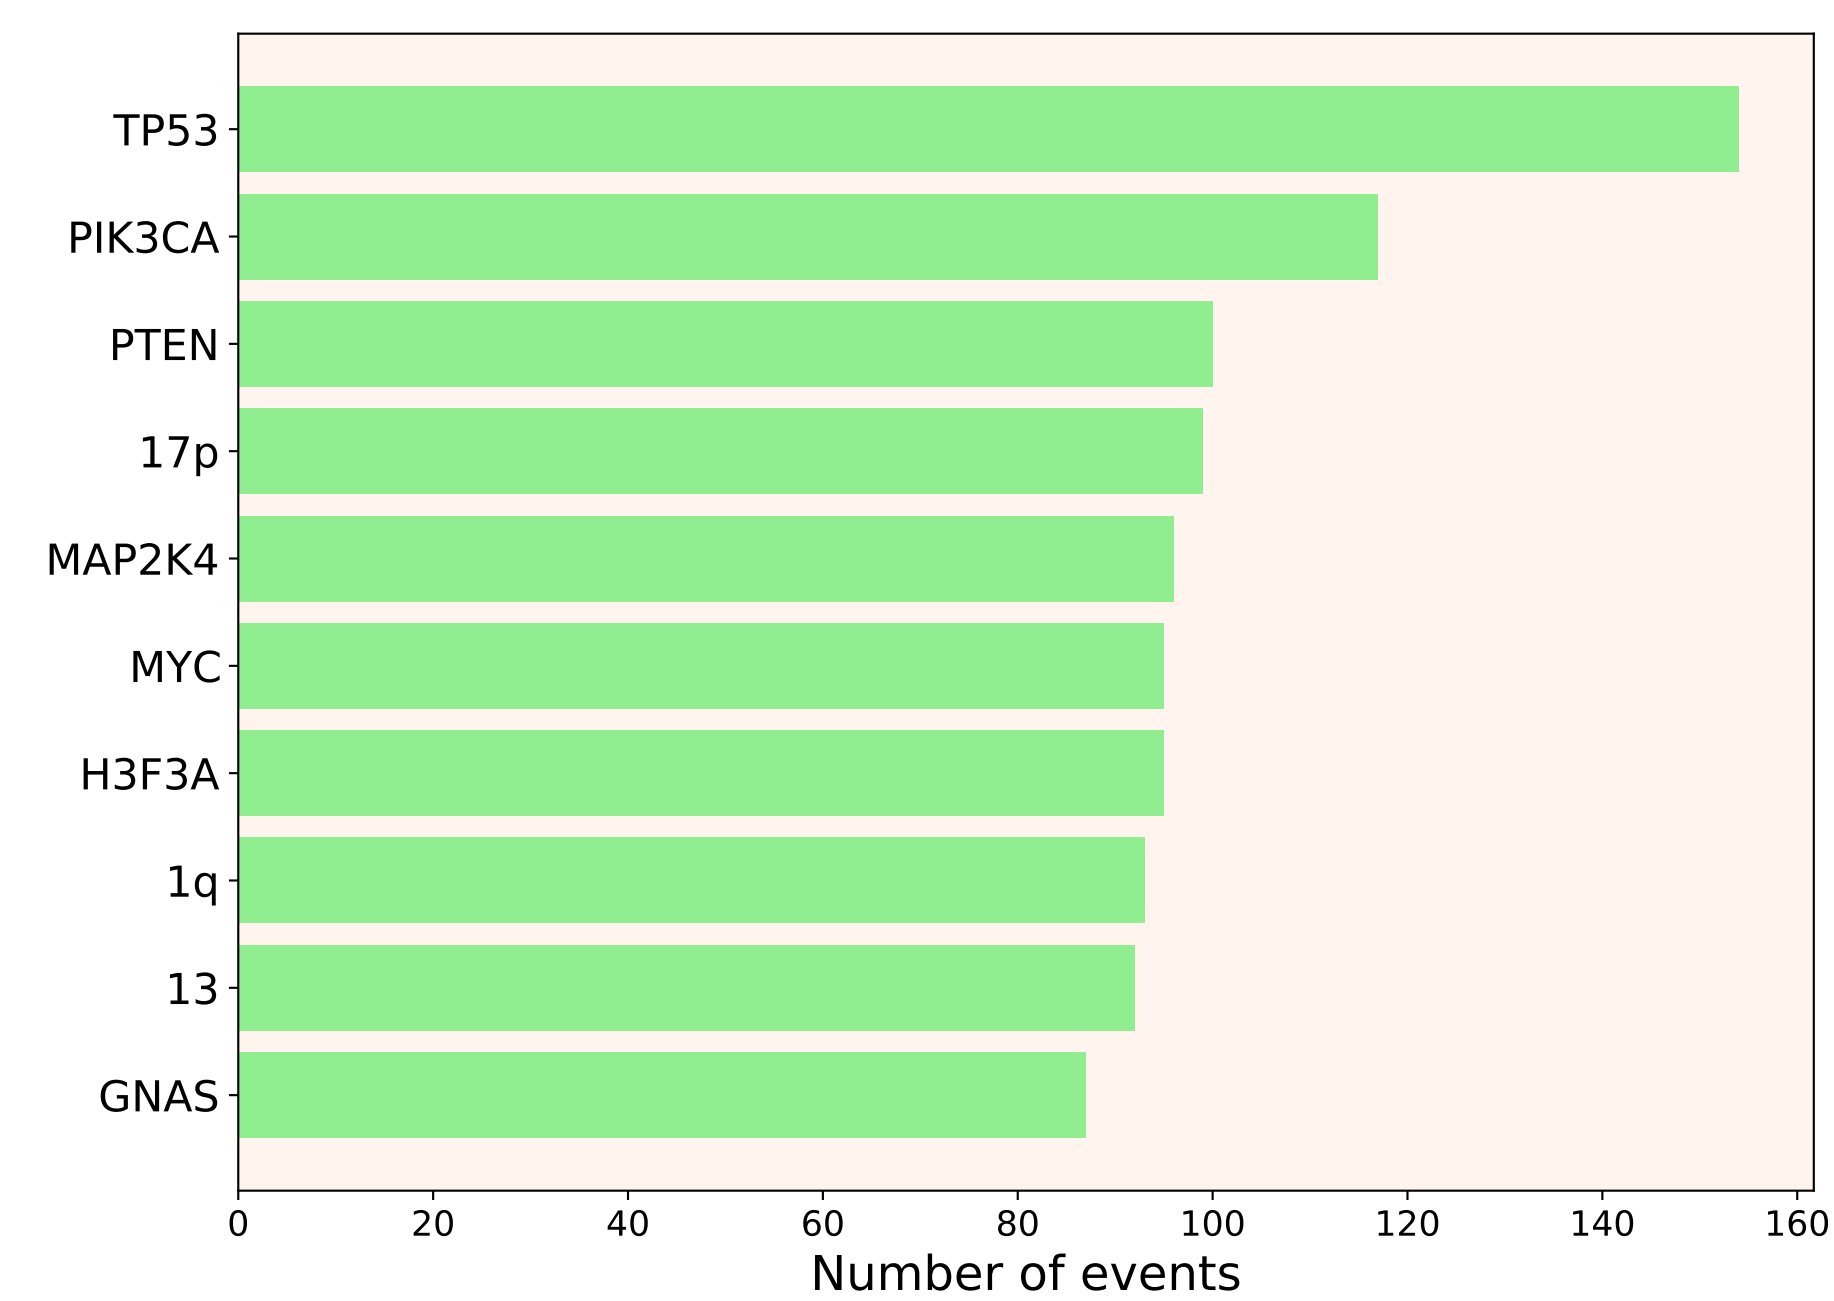

Supplement: Supplementary file [file media-1.zip]
