# Supplementary material for: Novel Driver Strength Index highlights important cancer genes in TCGA PanCanAtlas patients
Source: bioRxiv or medRxiv preprint supplement (doi:10.1101/2021.08.01.21261447), 2021-08-31

# UCS

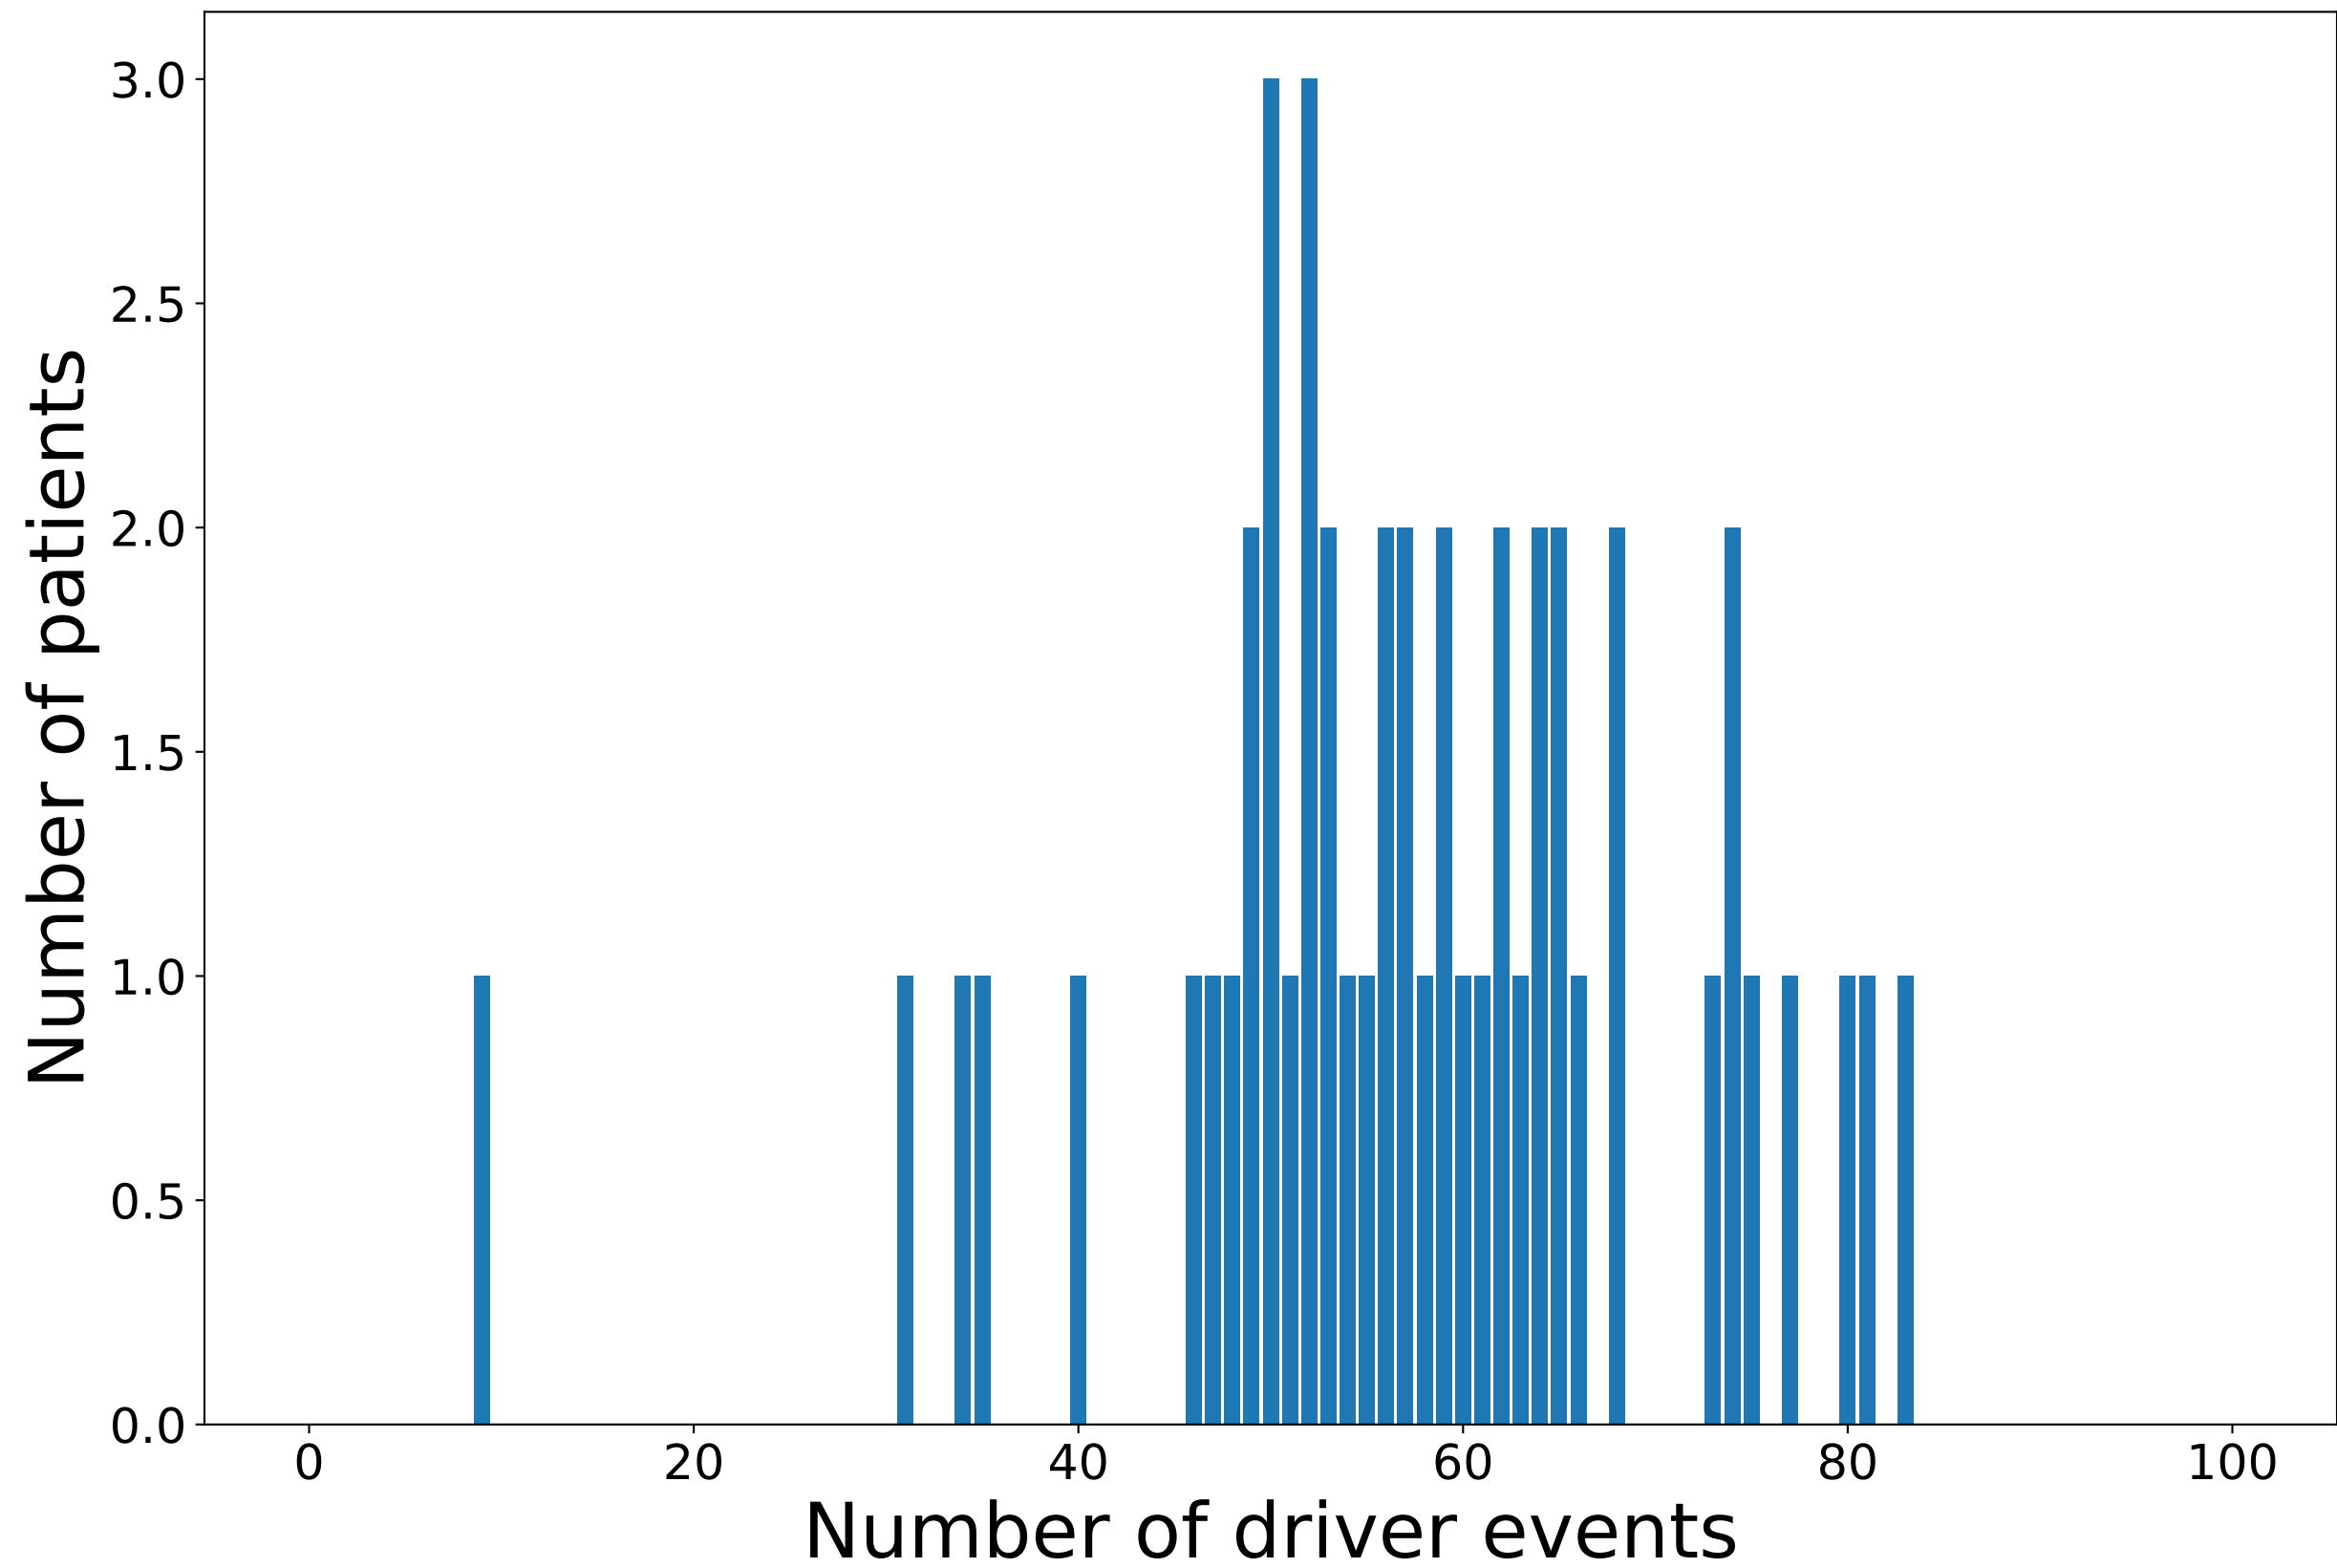

Supplement: Supplementary file [file media-1.zip]
